F: Enhanced Recovery After Surgery (ERAS) for gastrointestinal surgery, part 2: Consensus statement for anaesthesia practice. *Acta Anaesthesiol Scand* 2016; 60:289–334

27. Täubel J, Ferber G, Fox G, Fernandes S, Lorch U, Camm AJ: Thorough QT study of the effect of intravenous amisulpride on QTc interval in Caucasian and Japanese healthy subjects. *Br J Clin Pharmacol* 2017; 83:339–48

## ANESTHESIOLOGY REFLECTIONS FROM THE WOOD LIBRARY-MUSEUM

# Capsicum Drafts Could Not Relieve Ricksecker's Pain of Bankruptcy

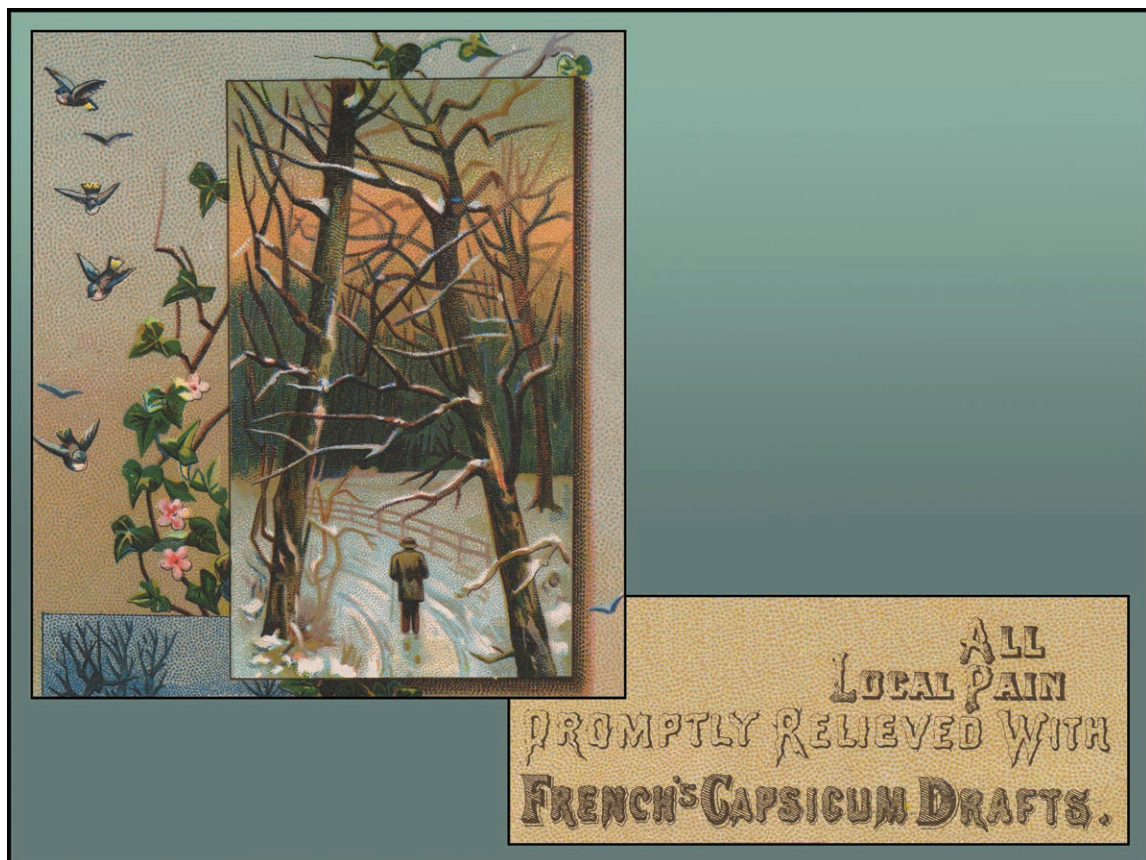

Born and raised in Ohio, Theodore Ricksecker (1846 to 1919) moved to Manhattan and began working in 1863 as a drugstore clerk before partnering with a seasoned druggist. Moving on as a solo businessman in 1876 to William Street, Ricksecker confined his wares to perfumes, toiletries, and Capsicum Drafts that he began advertising as “French’s” (*above*) and rapidly renamed as “Ricksecker’s.” The Capsicum Drafts were dry pads impregnated with chili pepper extract (capsaicin) that chemically warmed up once sprinkled with water. By applying this counterirritant near a painful site, the Drafts became a “warm friend in time of need.” Unfortunately, Ricksecker overexpanded his business and even Capsicum Drafts could not rescue him in 1896 from the pain of bankruptcy. (Copyright © the American Society of Anesthesiologists’ Wood Library-Museum of Anesthesiology.)

*George S. Bause, M.D., M.P.H., Honorary Curator and Laureate of the History of Anesthesia, Wood Library-Museum of Anesthesiology, Schaumburg, Illinois, and Clinical Associate Professor, Case Western Reserve University, Cleveland, Ohio. UJYC@aol.com.*
